# Supplementary material for: Soluble Expression of a Neo2/15-Conjugated Single Chain Fv against PD-L1 in Escherichia coli
Source: MDPI journal article supplement (doi:10.3390/cimb44010022), 2022-01-09
Supplement: s1 [file s1]

# Supplementary Materials:

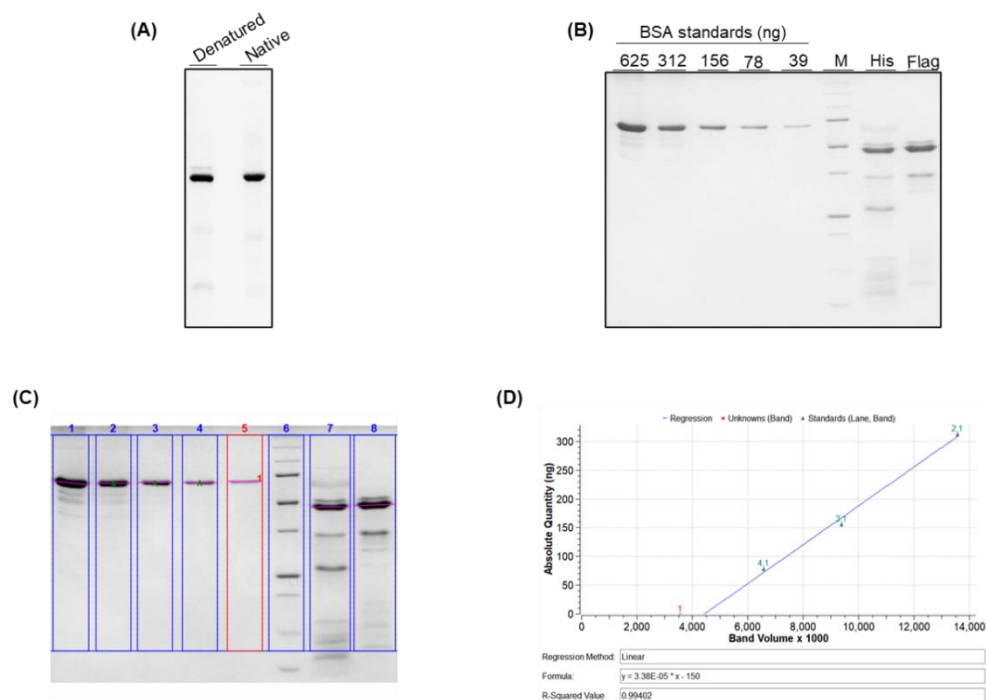

**Figure S1:** (A) Confirmation of the folding of His-tag purified protein by comparing the mobility shift of denatured (reduced using DTT and heating) and native (non-reduced) proteins on the gel. (B–D) Measurement of the concentration of proteins using Image Lab software. A standard curve was generated using a series diluted bovine serum albumin (BSA) as a standard protein. Next, each volume of the target band (BSA or fusion protein) was estimated using the Image Lab software and the absolute quantity of target protein was calculated using a standard curve.

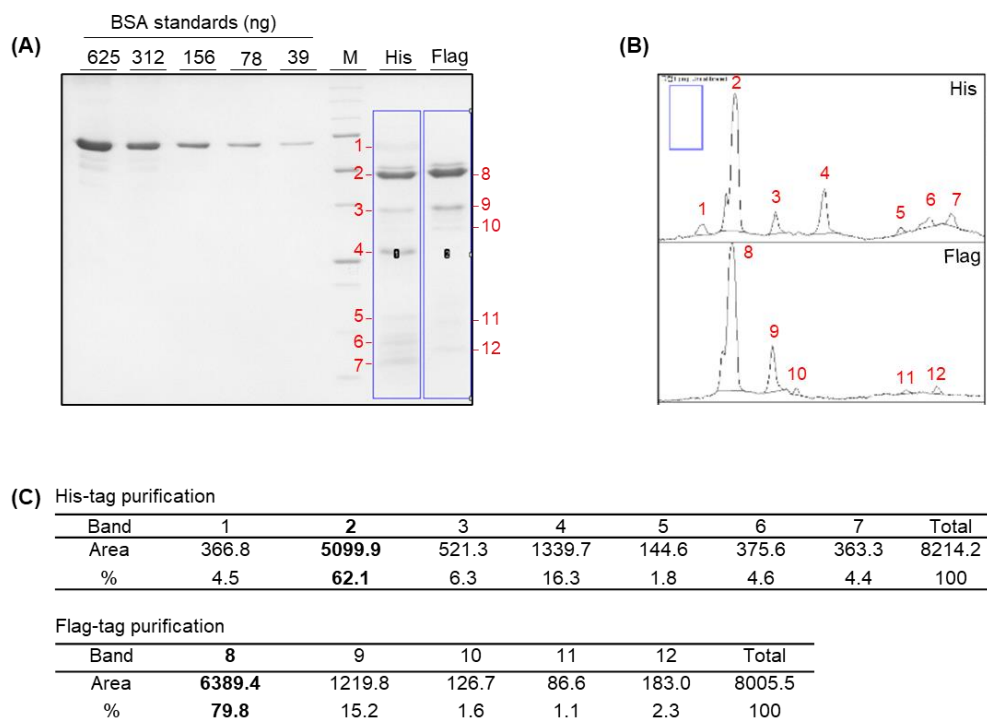

**Figure S2:** Measurement of the purity of proteins using ImageJ software. Each volume of the bands of protein was estimated using the ImageJ software (A, B) and the purity was calculated by  $(\text{area of target band})/(\text{total area of whole bands appeared on the gel}) \times 100$  (C).
